# Supplementary material for: Effects of nitrogen-doping on the photophysical properties of carbon dots
Source: Royal Society of Chemistry journal article supplement (doi:10.1039/c8tc04821e), 2018-11-15
Supplement: c8tc04821e1.pdf [file c8tc04821e1.pdf]

# SUPPLEMENTARY INFORMATION

## Effects of Nitrogen-Doping on the Photophysical Properties of Carbon Dots

John Manioudakis, Florence Victoria, Christine A. Thompson, Liam Brown, Michael Movsum,  
Roberto Lucifero and Rafik Naccache\*

*Department of Chemistry and Biochemistry, Concordia University, Montreal, QC, Canada,  
H4B1R6*

\* = Corresponding author (email: [rafik.naccache@concordia.ca](mailto:rafik.naccache@concordia.ca))

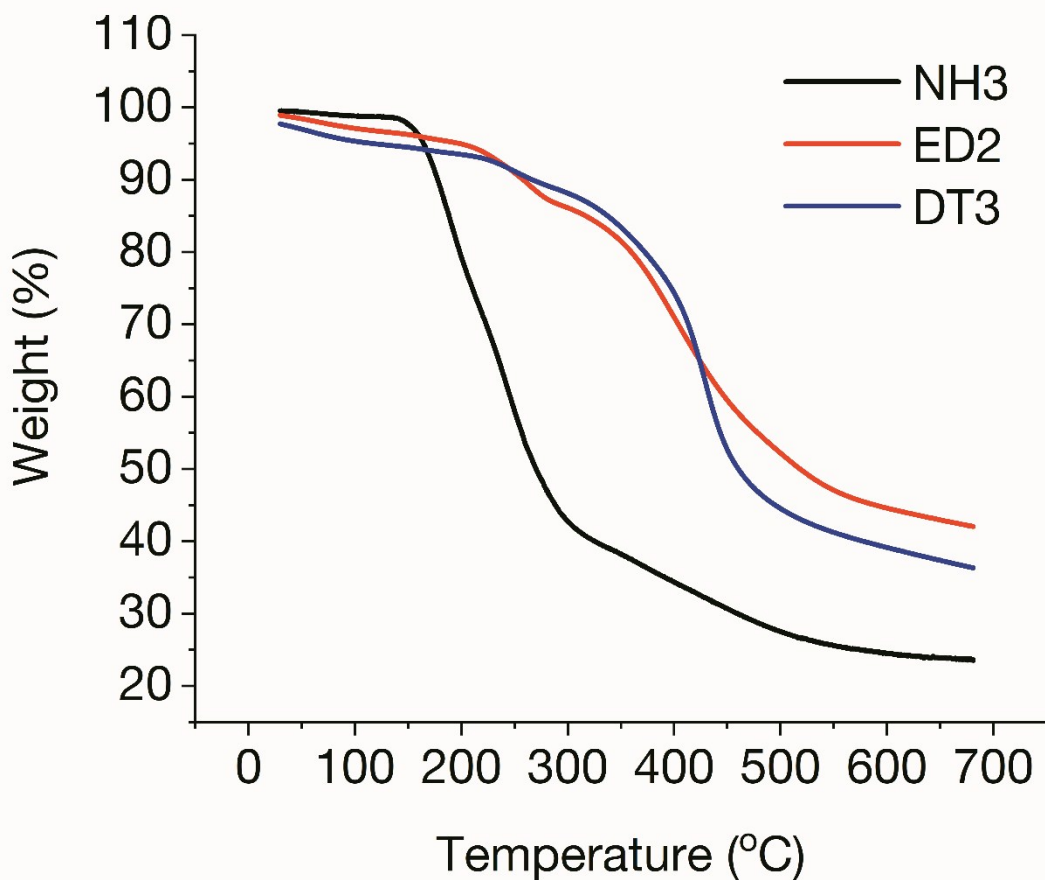

**Fig. S1** Thermogravimetric analysis of amino-passivated CDs. ED<sub>2</sub>- and DT<sub>3</sub>-CDs exhibit excellent thermal stability up to ~300 °C, with a maximal weight loss of 11%. Conversely, for NH<sub>3</sub>-CDs, we note a sharp onset of thermal instability for NH<sub>3</sub> at 160 °C.

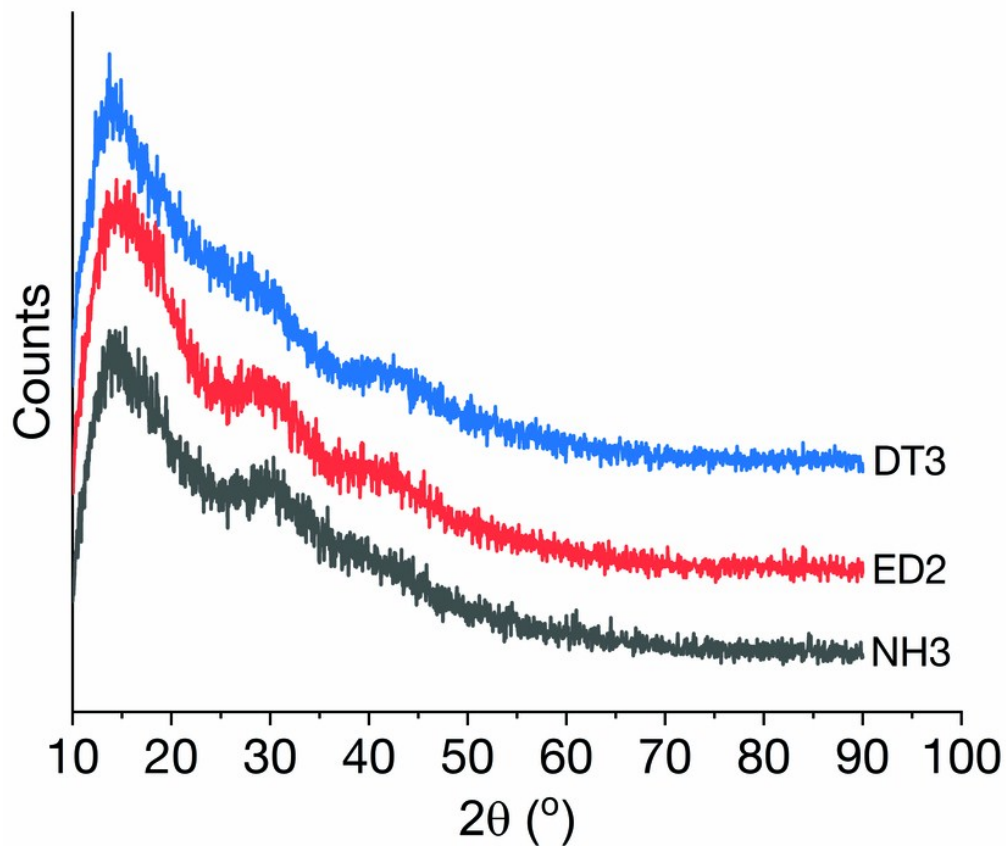

**Fig. S2** X-ray diffraction patterns for CDs synthesized using 500 mM citric acid and 375 mM of the passivating agent at a reaction temperature of 210 °C. The X-ray patterns reveal that the CDs are amorphous.

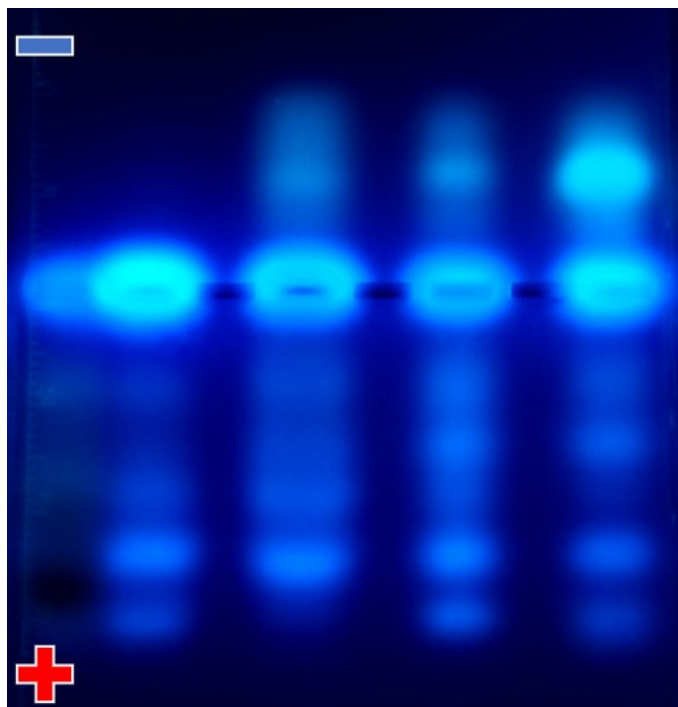

**Fig. S3** Agarose gel electrophoresis image of DT3-passivated CDs synthesized at 210 °C using 125 – 750 mM DT3 and visualised under 365 nm light. The positive and negative poles are marked on the top and bottom left corner of the image. The wells in the gel contain, from left to right, DT3-CDs synthesized using 125, 250, 375, 500 and 750 mM DT3 passivating agent, respectively. The results indicate that at higher DT3 concentrations, the proportion of positively-charged CDs progressively increases.

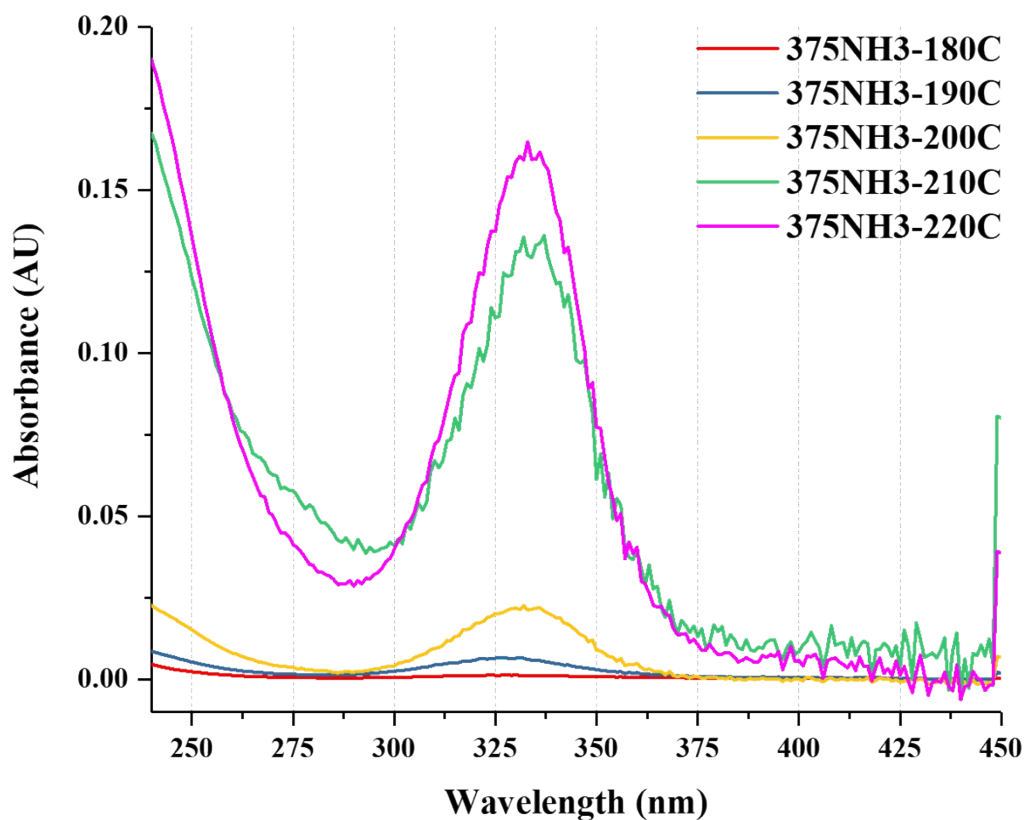

**Fig. S4** UV-Vis absorbance spectra of NH<sub>3</sub>-passivated CDs. All CDs were synthesized for 10 minutes using 500 mM citric acid with 375 mM NH<sub>3</sub> at 180, 190, 200, 210 and 220 °C.

**Fig. S5** UV-Vis absorbance spectra of ethylenediamine-passivated CDs. All CDs were synthesized for 10 minutes using 500 mM citric acid with: (A) 375 mM ethylenediamine at 180, 190, 200, 210 and 220 °C, (B) 125, 250, 375, 500 and 750 mM ethylenediamine at 220°C (data normalized to 16 µg/mL).

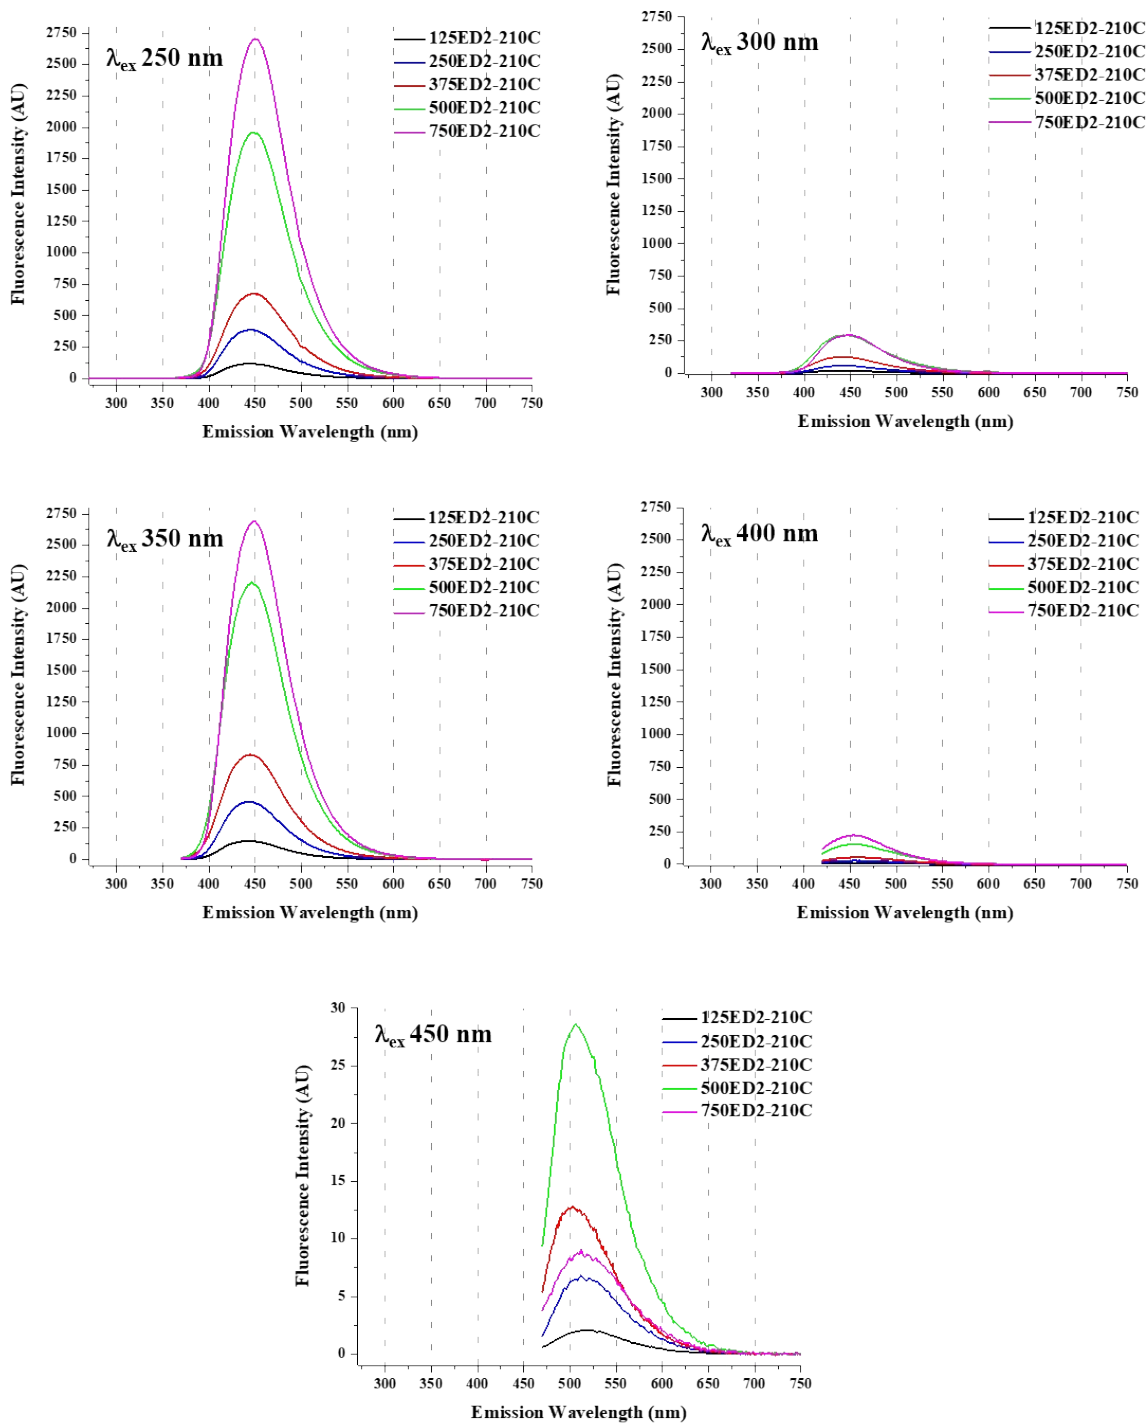

**Fig. S6** Steady state fluorescence spectra of ED2-passivated CDs. All CDs were synthesized for 10 minutes at 210 °C using 500 mM citric acid with 125, 250, 375, 500 and 750 mM ED2 (data normalized to 16  $\mu\text{g/mL}$ ).

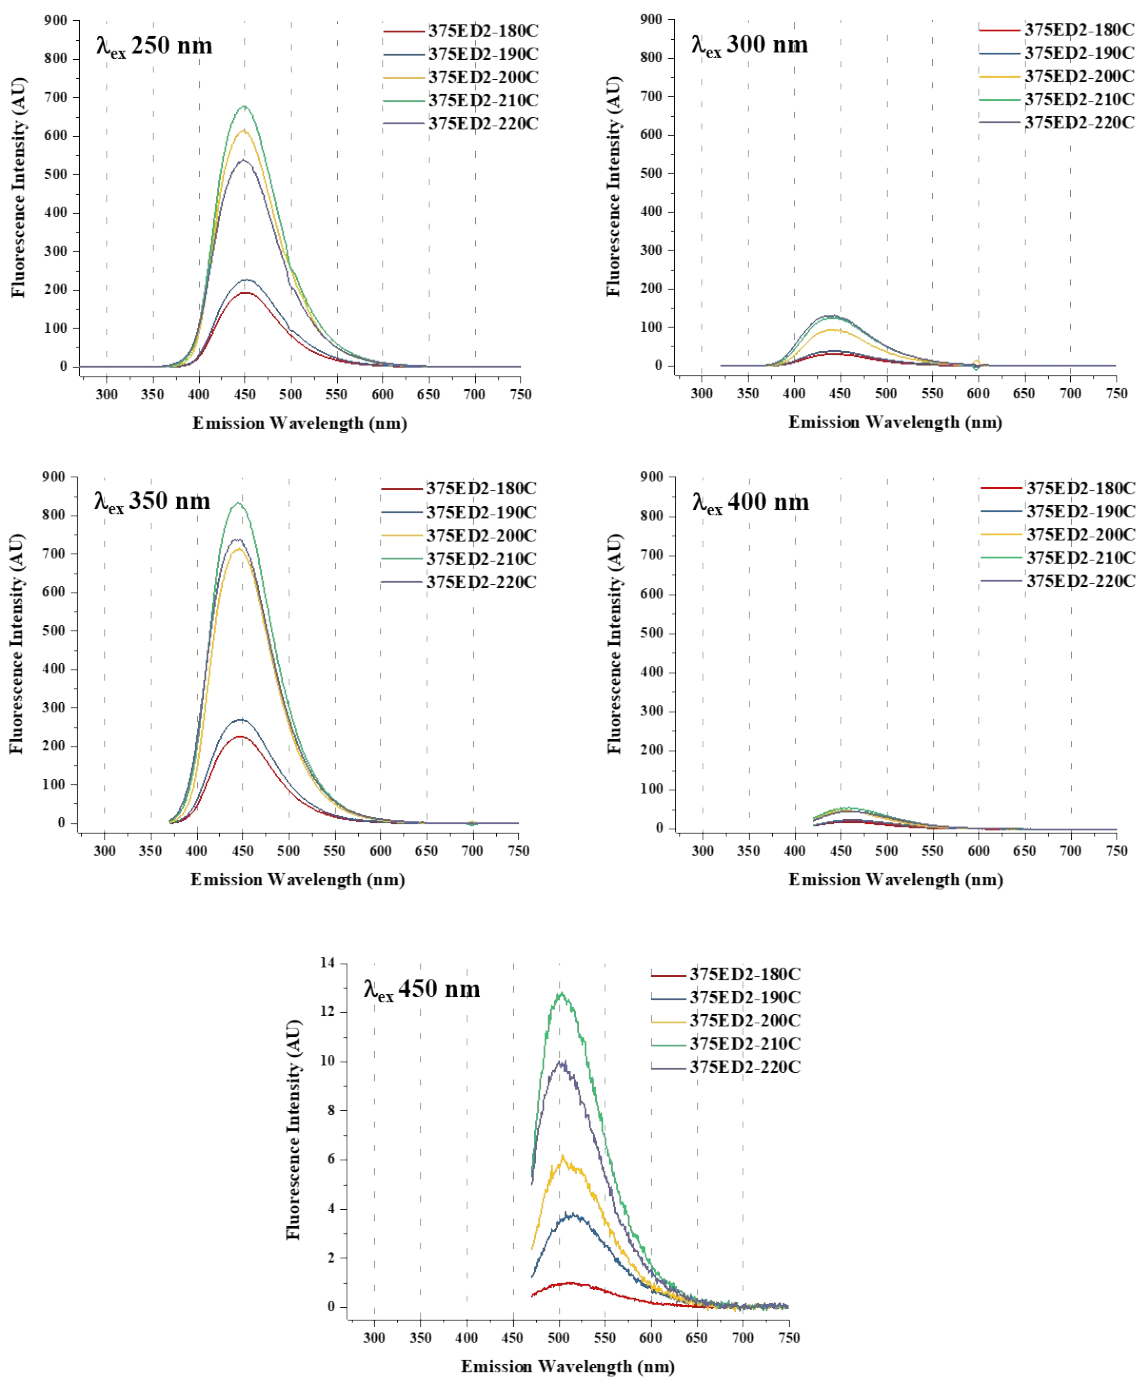

**Fig. S7** Steady state fluorescence spectra of ED2-passivated CDs. All CDs were synthesized for 10 minutes at 180, 190, 200, 210 and 220 °C using 500 mM citric acid with 375 mM ED2 (data normalized to 16  $\mu\text{g}/\text{mL}$ ).

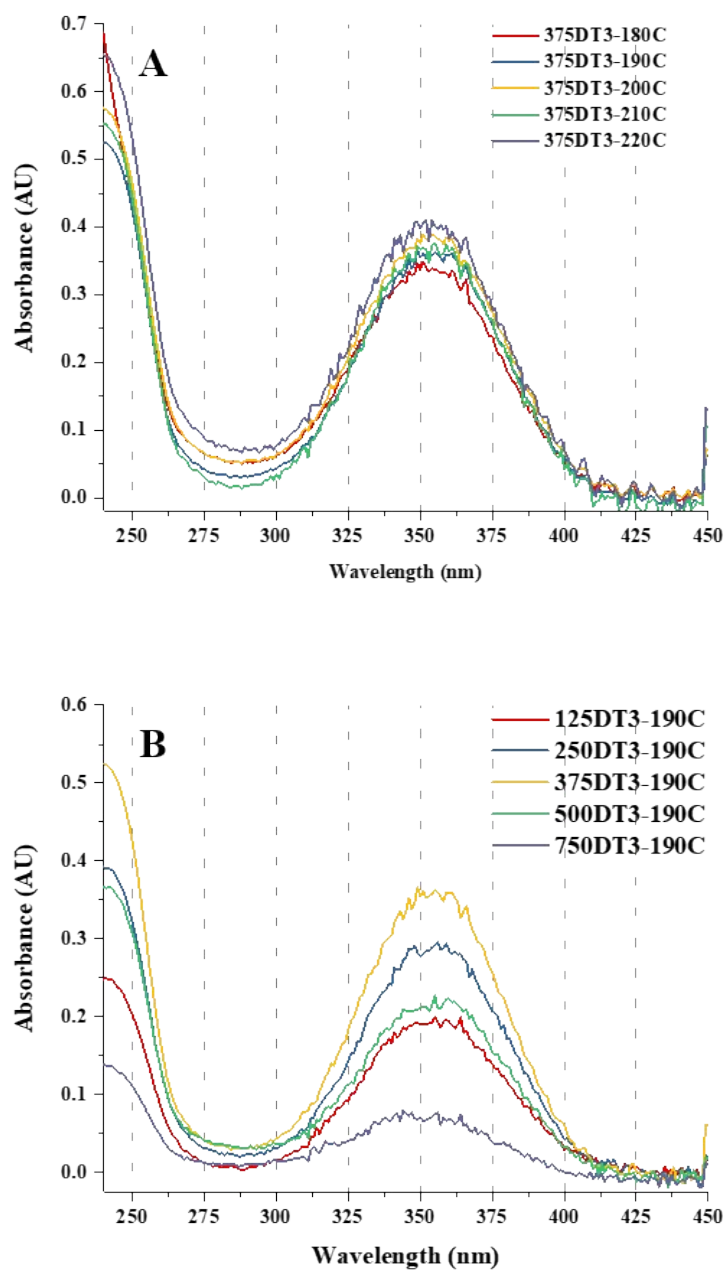

**Fig. S8** UV-vis absorbance spectra of DT3-passivated CDs. All CDs were synthesized for 10 minutes using 500 mM citric acid with (A) 375 mM DT3 at 180, 190, 200, 210 and 220 °C, (B) 125, 250, 375, 500 and 750 mM DT3 at 190 °C (data normalized to 16  $\mu\text{g/mL}$ ).



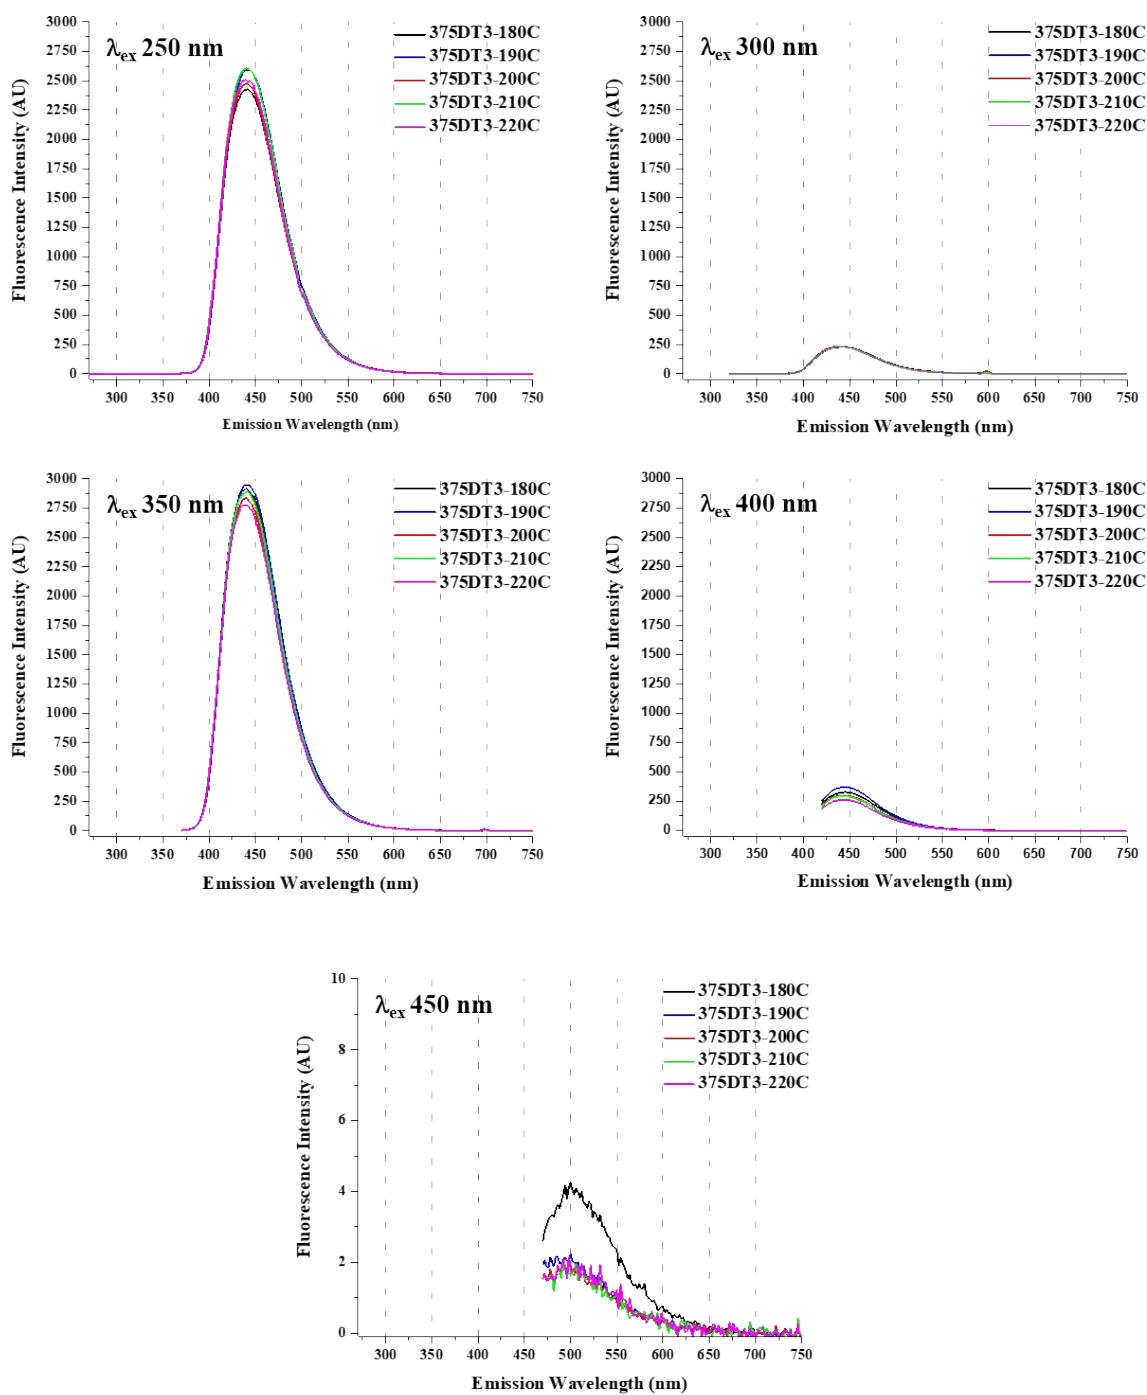

**Fig. S9** Steady state fluorescence spectra of DT3-passivated CDs. All CDs were synthesized for 10 minutes at 180, 190, 200, 210 and 220 °C, using 500 mM citric acid with 375 mM DT3 (data normalized to 16  $\mu\text{g/mL}$ ).

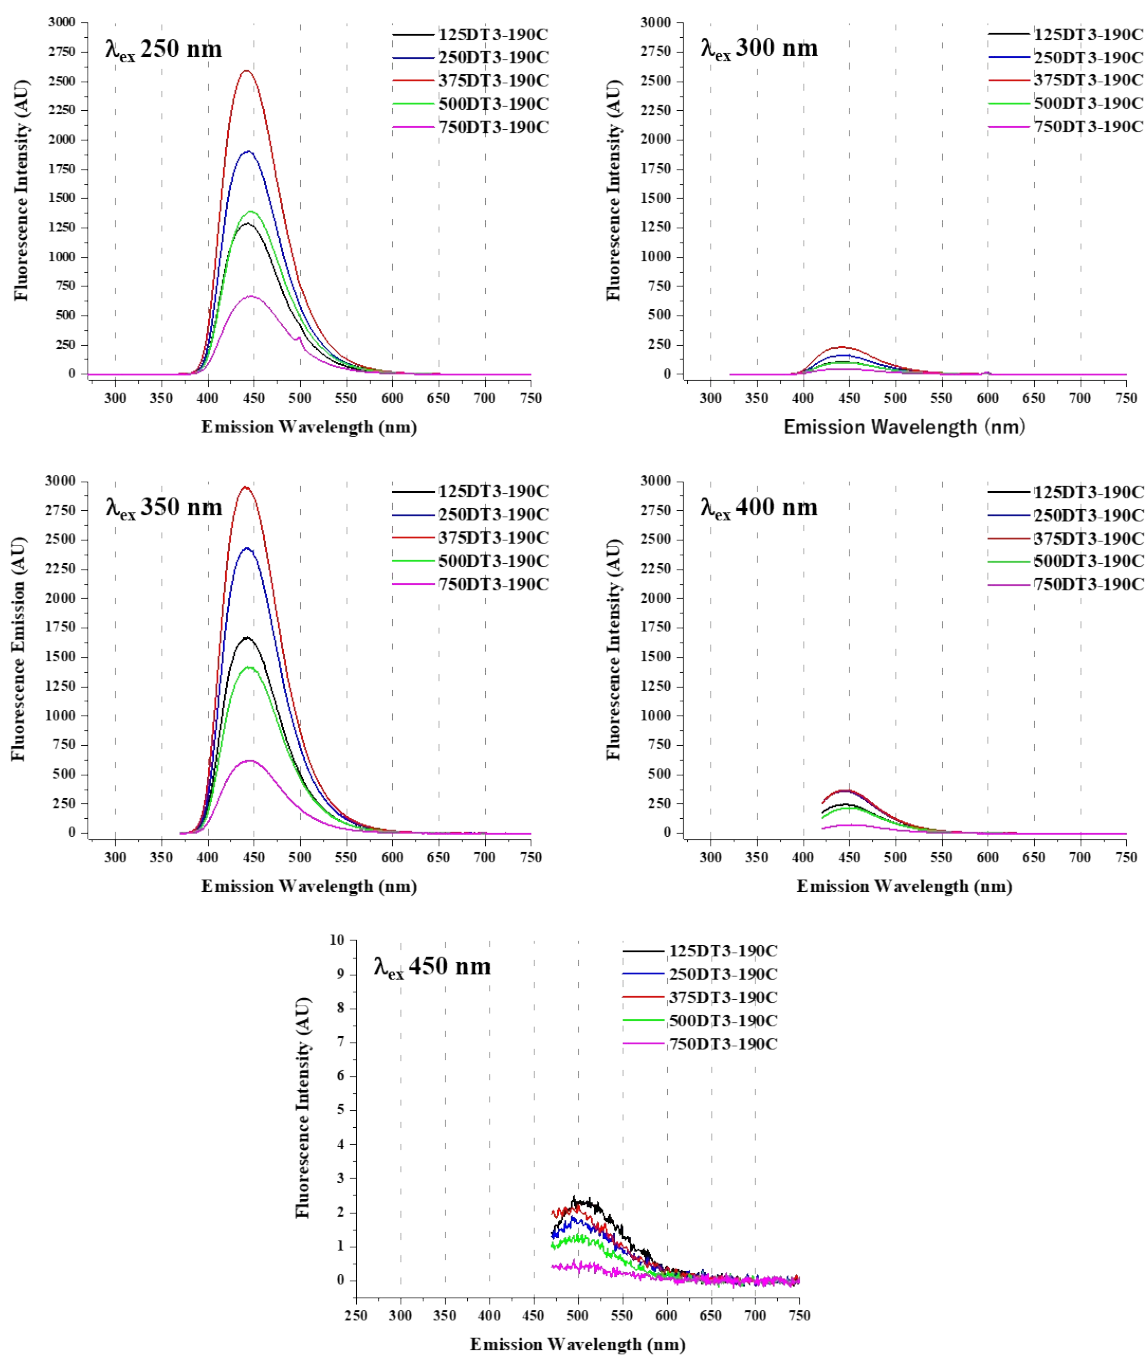

**Fig. S10** Steady state fluorescence spectra of DT3-passivated CDs. All CDs were synthesized for 10 minutes at 190 °C using 500 mM citric acid with 125, 250, 375, 500 and 750 mM DT3 (data normalized to 16  $\mu\text{g/mL}$ ).

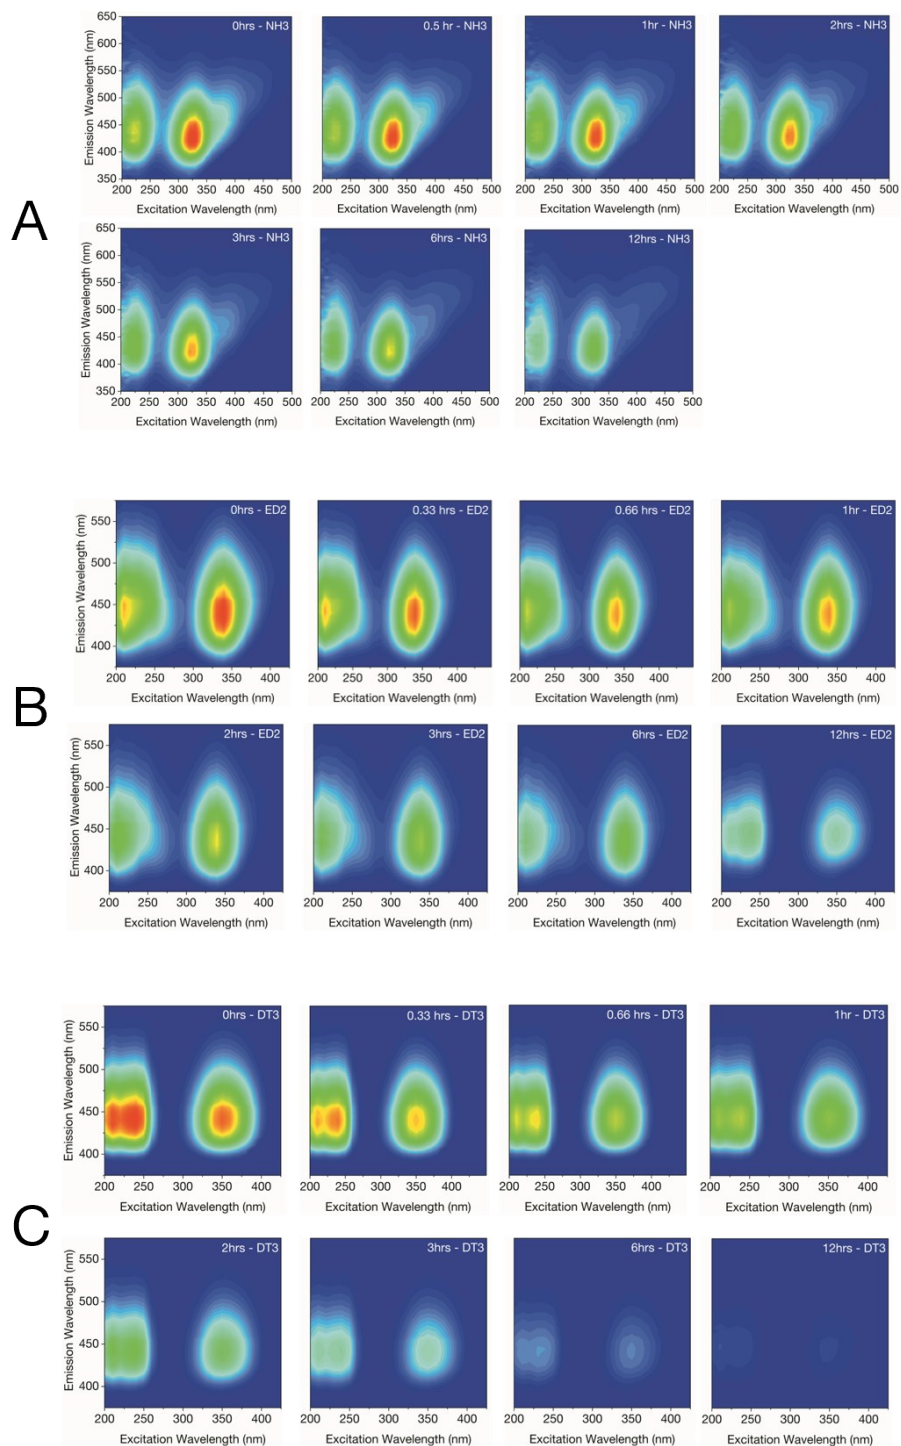

**Fig. S11** Time-based CD photobleaching experiment upon exposure at 365 nm. Fluorescence contour plots are shown for times 0, 0.33, 0.5, 0.66, 1, 2, 3, 6, and 12 hours (left to right) for (A) NH<sub>3</sub>-CDs, (B) ED2-CDs and (C) DT3-CDs. The contour plots exhibit the loss in fluorescence intensity for each CD system following timed exposure to 365 nm UV light, with NH<sub>3</sub>-CDs being most resistant to photobleaching, then ED2-CDs and finally DT3-CDs.

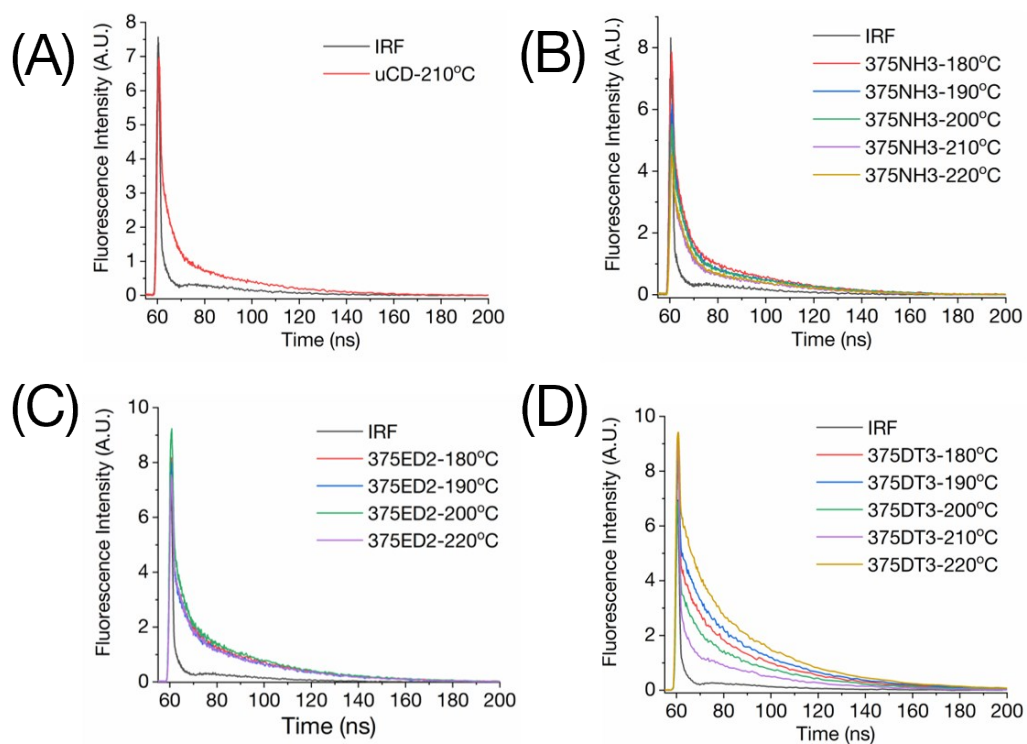

**Fig. S12** Fluorescence lifetime data plots for uCD and amine-passivated CDs synthesized using 375 mM passivating agent, at temperatures from 180 – 220 °C. (A) uCD; (B) NH<sub>3</sub>-CDs; (C) ED2-CDs; (D) DT3-CDs.

**Table S1** Tabulated volumes required to prepare 4 mL of 125, 250, 375, 500 and 750 mM amine-passivating agent. Each sample contains 500 mM citric acid.

| Passivating Agent | Passivating Agent Concentration (mM)                                            |     |     |     |     |
|-------------------|---------------------------------------------------------------------------------|-----|-----|-----|-----|
|                   | 125                                                                             | 250 | 375 | 500 | 750 |
|                   | Total Volume of Passivating Agent in 4 mL of Reaction Mixture ( $\mu\text{L}$ ) |     |     |     |     |
| NH <sub>3</sub>   | 34                                                                              | 69  | 103 | 138 | 206 |
| ED2               | 34                                                                              | 67  | 100 | 134 | 200 |
| DT3               | 54                                                                              | 108 | 162 | 216 | 324 |

**Table S2** Fluorescence lifetime properties of aqueous suspensions of uCD, NH<sub>3</sub>- and polyamine-passivated carbon dots synthesized using 500 mM citric acid and 375 mM passivating agent at 180, 190, 200, 210 and 220 °C. The fluorescence data was fitted to a 2-component decay system.

| CD Type     | $\tau_1$ (ns) |            | Population 1 (%) |           | $\tau_2$ (ns)  |            | Population 2 (%) |          | $\chi^2$ |
|-------------|---------------|------------|------------------|-----------|----------------|------------|------------------|----------|----------|
|             | Value         | ±          | Value            | ±         | Value          | ±          | Value            | ±        |          |
| uCD-210C    | <b>0.3012</b> | ±9.7891e-3 | <b>91.2</b>      | ±2.9560%  | <b>5.7210</b>  | ±6.5937e-2 | <b>8.8</b>       | ±0.0687% | 1.086    |
| 375NH3-180C | <b>0.4029</b> | ±2.3598e-2 | <b>86.6</b>      | ±4.1860%  | <b>5.7170</b>  | ±1.3228e-1 | <b>13.4</b>      | ±0.1727% | 1.024    |
| 375NH3-190C | <b>0.4146</b> | ±7.5880e-4 | <b>81.6</b>      | ±0.1560%  | <b>5.5580</b>  | ±4.6432e-3 | <b>18.4</b>      | ±0.0143% | 1.118    |
| 375NH3-200C | <b>0.3673</b> | ±3.3595e-2 | <b>79.8</b>      | ±6.8530%  | <b>5.4960</b>  | ±9.8743e-2 | <b>20.2</b>      | ±0.2188% | 0.881    |
| 375NH3-210C | <b>0.3254</b> | ±5.5024e-3 | <b>79.1</b>      | ±1.3720%  | <b>5.2900</b>  | ±2.2494e-2 | <b>20.9</b>      | ±0.0949% | 1.489    |
| 375NH3-220C | <b>0.4971</b> | ±4.8880e-2 | <b>75.8</b>      | ±6.2970%  | <b>5.4000</b>  | ±1.6131e-1 | <b>24.2</b>      | ±0.3802% | 0.955    |
| 375ED2-180C | <b>0.2168</b> | ±2.1277e-2 | <b>94.3</b>      | ±8.7170%  | <b>8.0680</b>  | ±1.0029e-1 | <b>5.7</b>       | ±0.0411% | 0.981    |
| 375ED2-190C | <b>0.2312</b> | ±3.4104e-4 | <b>93.1</b>      | ±0.1520%  | <b>7.5390</b>  | ±5.5115e-3 | <b>6.9</b>       | ±0.0050% | 1.065    |
| 375ED2-200C | <b>0.2976</b> | ±1.8108e-2 | <b>92.0</b>      | ±5.2620%  | <b>7.4710</b>  | ±9.2560e-2 | <b>8.1</b>       | ±0.0733% | 0.915    |
| 375ED2-210C | <b>0.3406</b> | ±3.1448e-2 | <b>94.2</b>      | ±10.3500% | <b>7.1220</b>  | ±9.5495e-2 | <b>5.8</b>       | ±0.0654% | 1.218    |
| 375ED2-220C | <b>0.2614</b> | ±1.6011e-2 | <b>91.5</b>      | ±5.3350%  | <b>7.1290</b>  | ±7.7469e-2 | <b>8.5</b>       | ±0.0566% | 1.031    |
| 375DT3-180C | <b>0.3001</b> | ±7.7830e-4 | <b>89.4</b>      | ±0.1985%  | <b>11.4000</b> | ±6.8647e-3 | <b>10.6</b>      | ±0.0065% | 2.069    |
| 375DT3-190C | <b>0.2893</b> | ±7.7435e-4 | <b>88.0</b>      | ±0.2091%  | <b>12.0800</b> | ±7.2093e-3 | <b>12.0</b>      | ±0.0059% | 2.359    |
| 375DT3-200C | <b>0.2766</b> | ±2.5180e-2 | <b>91.1</b>      | ±7.7230%  | <b>11.3200</b> | ±1.6233e-1 | <b>8.9</b>       | ±0.0887% | 1.592    |
| 375DT3-210C | <b>0.3210</b> | ±5.8865e-4 | <b>96.6</b>      | ±0.1381%  | <b>11.2900</b> | ±1.1086e-2 | <b>3.4</b>       | ±0.0032% | 2.061    |
| 375DT3-220C | <b>0.3992</b> | ±8.4451e-4 | <b>82.0</b>      | ±0.1711%  | <b>12.3200</b> | ±6.7195e-3 | <b>18.0</b>      | ±0.0075% | 2.243    |
